# Supplementary material for: POSS-induced enhancement of mechanical strength in RAFT-made thermoresponsive hydrogels
Source: Royal Society of Chemistry journal article supplement (doi:10.1039/c5py00664c), 2015-01-01
Supplement: c5py00664c1.pdf [file c5py00664c1.pdf]

## Supporting information for

### POSS Induced Enhancement of Mechanical Strength in the RAFT Made Thermoresponsive Hydrogels

Ujjal Haldar, Mridula Nandi, Binoy Maiti and Priyadarsi De\*

Polymer Research Centre, Department of Chemical Sciences, Indian Institute of Science  
Education and Research Kolkata, Mohanpur - 741246, Nadia, West Bengal, India

\*Corresponding Author: e-mail: p\_de@iiserkol.ac.in (P.D.).

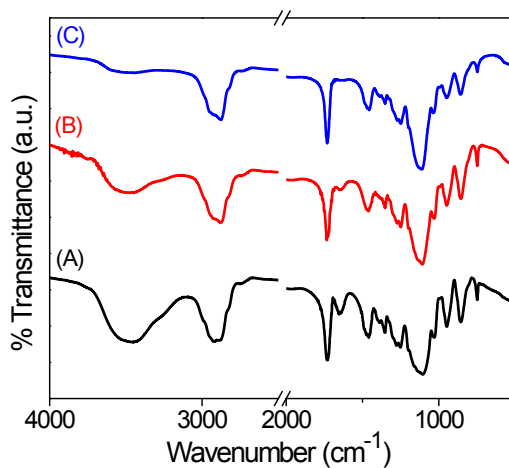

**Fig. S1** FT-IR spectra of (A) F25, (B) R25, and (C) RP25.

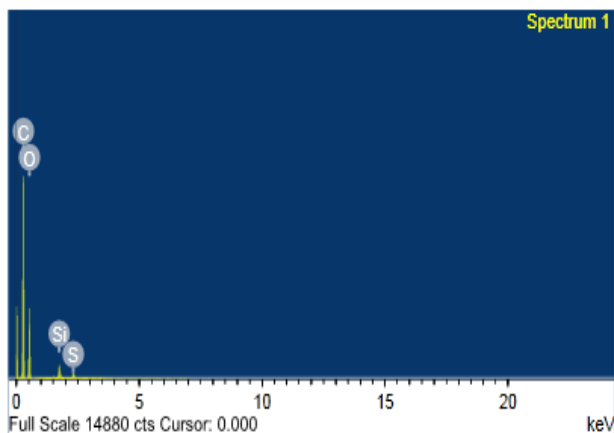

Fig. S2 SEM-EDX spectrum of RP35.

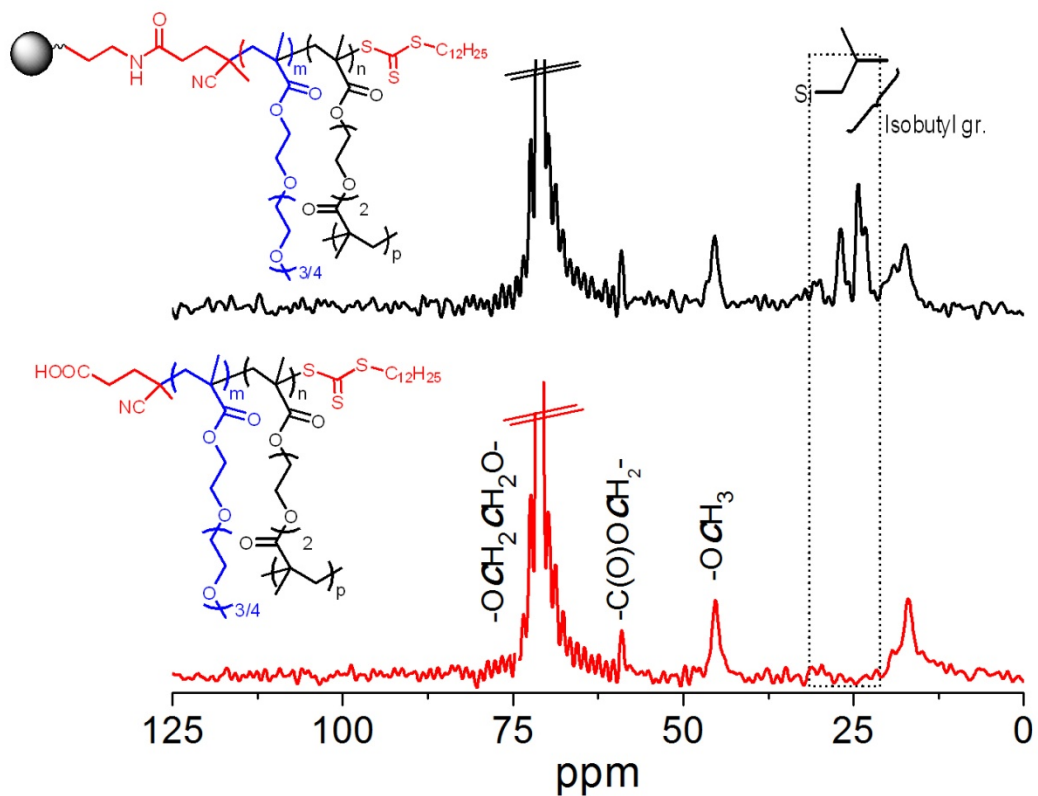

Fig. S3 Solid state  $^{13}\text{C}$  CP/MAS NMR spectra of R25 (red) and RP25 (black).

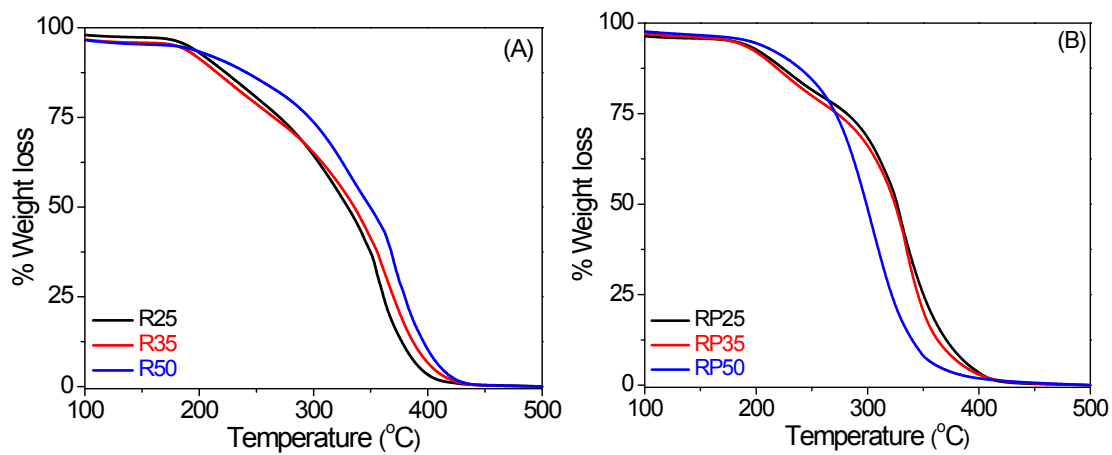

**Fig. S4** Comparison of TGA profiles of CDP based (A) and POSS modified CDP based (B) hydrogels.

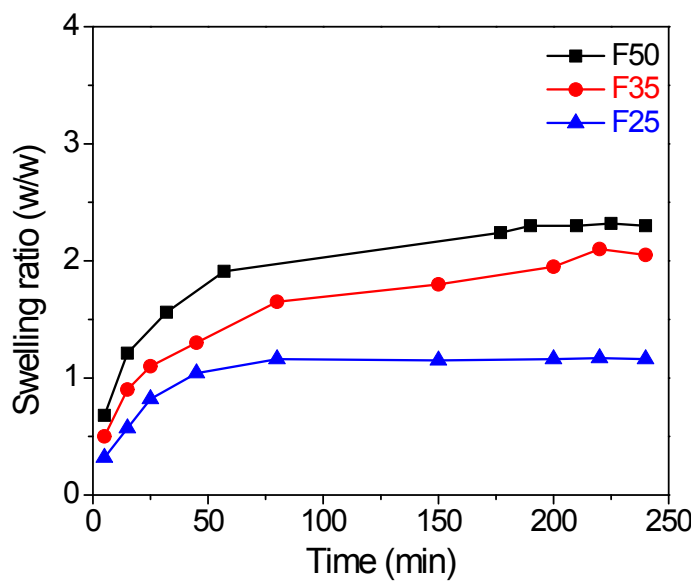

**Fig. S5** Swelling behavior of FRP based hydrogels at 22 °C as a function of time.
